# Supplementary material for: Theoretical insight into decatungstate photocatalyzed alkylation ofN-tosylimineviahydrogen atom transfer and proton-coupled electron transfer
Source: Royal Society of Chemistry journal article supplement (doi:10.1039/d2dt00927g), 2022-01-01
Supplement: d2dt00927g1.pdf [file d2dt00927g1.pdf]

## Electronic Supplementary Information

# Theoretical insight of decatungstate photocatalyzed alkylation of N-tosylimine via hydrogen atom transfer and proton-coupled electron transfer

Lingying Meng, Yujiao Dong, Bo Zhu, Yujie Liang, Zhongmin Su, and Wei Guan\*  
Institute of Functional Material Chemistry, Faculty of Chemistry, Northeast Normal  
University, Changchun 130024, P. R. China.

E-mail: guanw580@nenu.edu.cn

### Table of Contents

#### COMPUTATIONAL DETAILS

|                                                                                     |            |
|-------------------------------------------------------------------------------------|------------|
| .....                                                                               | S1         |
| 1. Correction of translational entropy in solution.....                             | S1         |
| 2. Absorption spectra for<br>[W <sub>10</sub> O <sub>32</sub> ] <sup>4-</sup> ..... | S2         |
| 3. Stepwise PCET process for C–H<br>activation.....                                 | S3         |
| 4. Redox potential.....                                                             | S3         |
| 5. The fragment charge distribution of HAT<br>process.....                          | S4         |
| 6. Analysis of regioselectivity for radical addition process.....                   | S5         |
| REFERENCES .....                                                                    | S5         |
| CARTESIAN COORDINATES OF OPTIMIZED STRUCTURES .....                                 | S5-<br>S29 |

## COMPUTATIONAL DETAILS

### 1. Correction of translational entropy in solution

We evaluated the electronic energy ( $E_{sol}$ ) with zero-point energy correction in solution. For each species, the  $E_{sol}$  is defined through equation (S1):

$$E_{sol} = E_{sol}^{pot} + E_{gas}^{v_0} \quad (S1)$$

the  $E_{sol}^{pot}$  is the potential energy including non-electrostatic energy in solution and  $E_{gas}^{v_0}$  denotes the zero-point vibrational energy in the gas phase. In a bimolecular process, such as the coordination of  $*[W_{10}O_{32}]^{4-}$  to methyl tert-butyl ether, the entropy change which can decrease considerably must be taken into consideration. In such case, Gibbs energy ( $G_{sol}^o$ ) need be computed as follows:

$$\begin{aligned} G_{sol}^o &= H_0 - T(S_r^o + S_v^o + S_t^o) \\ &= E^T + P\Delta V - T(S_r^o + S_v^o + S_t^o) \\ &= E_{sol} + E_{therm} - T(S_r^o + S_v^o + S_t^o) \end{aligned} \quad (S2)$$

where  $\Delta V$  is 0 in solution,  $E_{therm}$  is the thermal correction by translational, vibrational, and rotational movements, and  $S_r^o$ ,  $S_v^o$ , and  $S_t^o$  are rotational, vibrational, and translational entropies, respectively. In general, the Sackur-Tetrode equation is used to evaluate translational entropy  $S_t^o$ . In solution, however, the usual Sackur-Tetrode equation cannot be directly applied to the evaluation of  $S_t^o$ , because the translation movement is suppressed very much in solution.<sup>S1-S3</sup> In this context, the translational entropy was corrected with the method developed by Whitesides et al., where the rotational entropy was evaluated in a normal manner. Thermal correction and entropy contributions of vibration movements to the Gibbs energy were evaluated with the frequencies calculated at 299.15 K and 1 atm.

**Table S1** Comparison of Gibbs free energy change ( $\Delta G^\circ$ ) without and with translational entropy correction of key intermediates and transition states.

| Energies   | without translational<br>entropy correction<br>$\Delta G^\circ$ (kcal/mol) | with translational<br>entropy correction<br>$\Delta G^\circ$ (kcal/mol) |
|------------|----------------------------------------------------------------------------|-------------------------------------------------------------------------|
| <b>1</b>   | 0.0                                                                        | 0.0                                                                     |
| <b>2</b>   | 7.4                                                                        | 1.5                                                                     |
| <b>TS1</b> | 9.3                                                                        | 3.4                                                                     |
| <b>3</b>   | -15.5                                                                      | -15.5                                                                   |
| <b>4</b>   | -6.7                                                                       | -12.6                                                                   |
| <b>TS2</b> | -2.3                                                                       | -8.2                                                                    |
| <b>5</b>   | -9.6                                                                       | -15.6                                                                   |
| <b>6</b>   | -25.6                                                                      | -31.5                                                                   |
| <b>7</b>   | -32.6                                                                      | -44.4                                                                   |
| <b>TS3</b> | -35.3                                                                      | -47.1                                                                   |
| <b>8</b>   | -47.5                                                                      | -53.4                                                                   |
| <b>9</b>   | -6.0                                                                       | -12.0                                                                   |
| <b>TS4</b> | 0.5                                                                        | -5.5                                                                    |
| <b>10</b>  | -19.4                                                                      | -25.3                                                                   |
| <b>11</b>  | 4.5                                                                        | -1.4                                                                    |

## 2. Absorption spectra for $[\text{W}_{10}\text{O}_{32}]^{4-}$

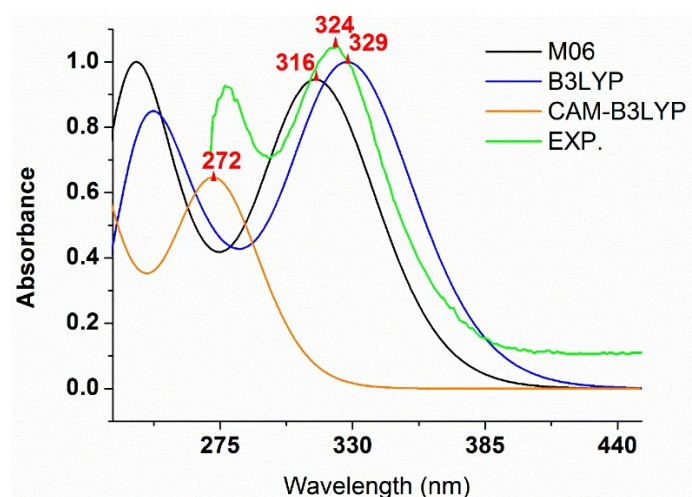

**Fig. S1** Comparisons of experimental and calculated absorption spectra of  $[\text{W}_{10}\text{O}_{32}]^{4-}$ .

### 3. Stepwise PCET process for C–H activation

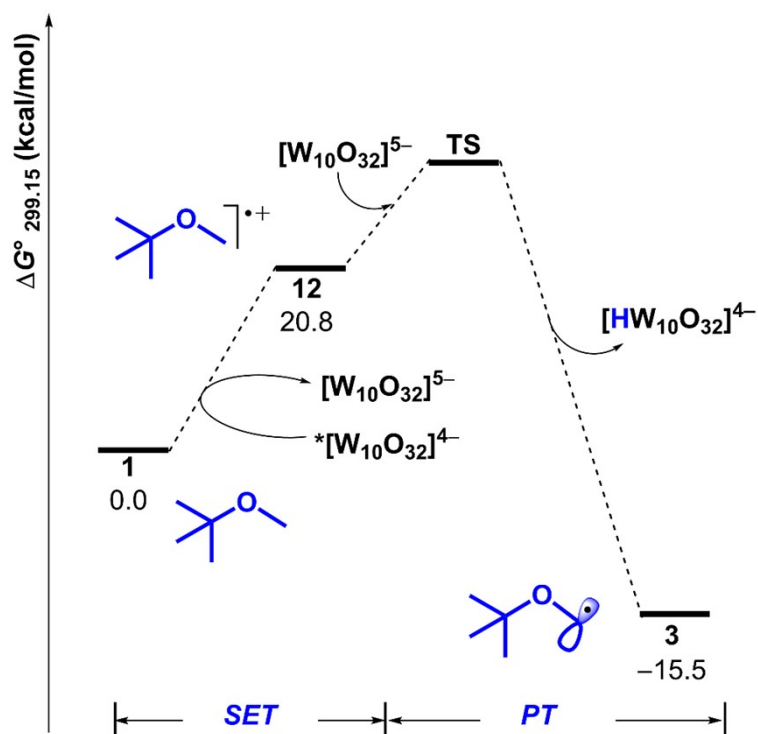

**Fig. S2** Gibbs energy profile ( $\Delta G^{\circ}_{299.15}$ ) of the stepwise PCET process for C(sp<sup>3</sup>)–H bond activation.

### 4. Redox potential

We calculated the standard redox potential ( $E_{1/2}^{red}$ ) according to the equation (S3):<sup>S4</sup>

$$E_{1/2}^{red} = -\frac{\Delta G_r}{nF} - E_{Ag/Ag^+} \quad (\text{S3})$$

where  $F$  is the Faraday constant and  $n$  is the number of electrons transferred,

$E_{Ag/Ag^+} = 4.47$  V, and  $\Delta G_r$  is the free energy change of the reaction.

**Table S2** The experimental and calculated redox potentials of  $[W_{10}O_{32}]^{4-}$ .

| Redox Potential | $E_{1/2}^{red} (*[W_{10}O_{32}]^{4-}/[W_{10}O_{32}]^{5-})$ |
|-----------------|------------------------------------------------------------|
| Cal.            | -0.7 V                                                     |

|            |         |
|------------|---------|
| Exp.       | -0.96 V |
| $ \Delta $ | 0.26 V  |

**Table S3** The calculated redox potentials of **5** and **10**.

| Redox Potential | $E_{1/2}^{\text{red}}([\text{HW}_{10}\text{O}_{32}]^{3-}/[\text{HW}_{10}\text{O}_{32}]^{4-})$ | $E_{1/2}^{\text{red}}(\mathbf{5}/\mathbf{6})$ | $E_{1/2}^{\text{red}}(\mathbf{10}/\mathbf{11})$ |
|-----------------|-----------------------------------------------------------------------------------------------|-----------------------------------------------|-------------------------------------------------|
| Cal.            | -0.20 V                                                                                       | 0.50 V                                        | -1.20 V                                         |

### 5. The fragment charge distribution of HAT process

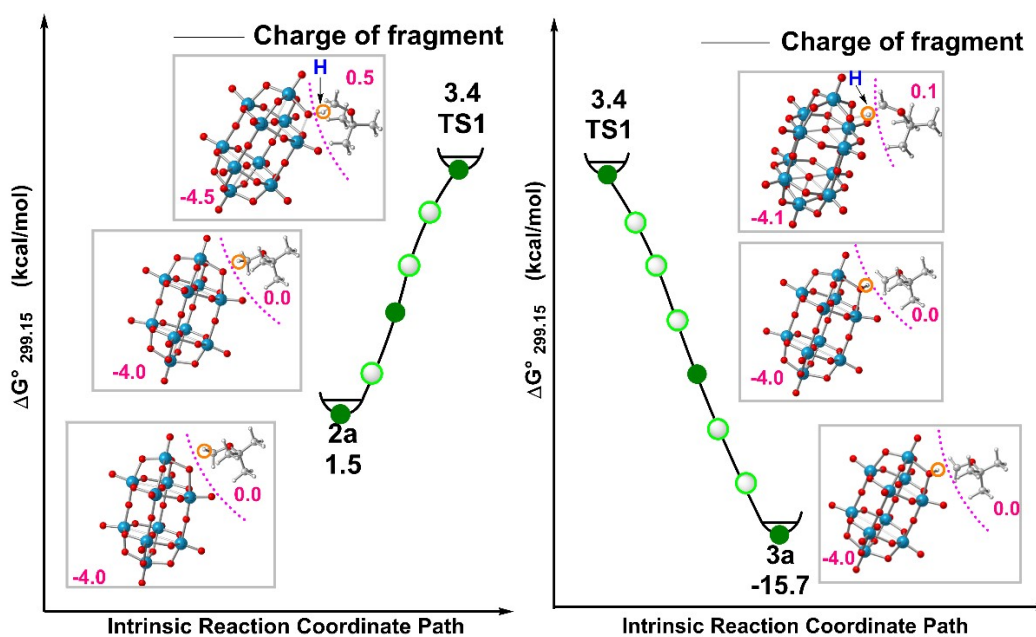

**Fig. S3** Fragment charge analysis along the intrinsic reaction coordinate pathway in the hydrogen atom transfer process.

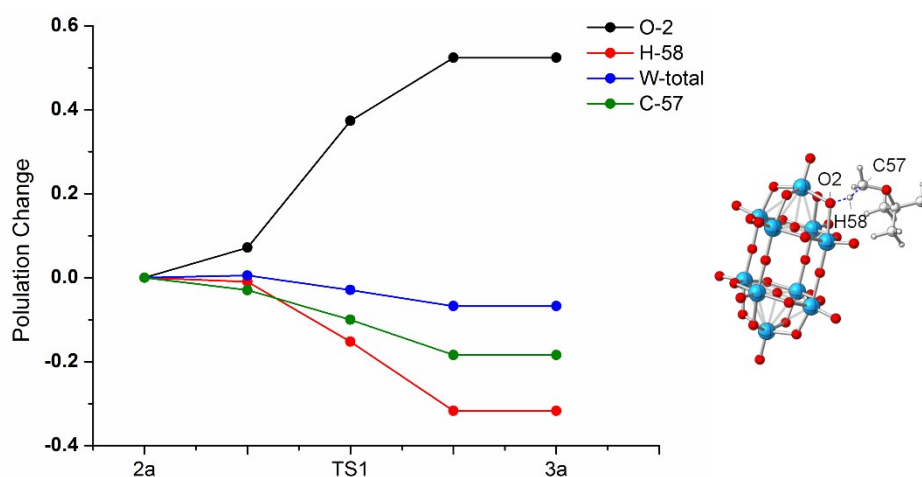

**Fig. S4** Changes in electron population (in e) along the intrinsic reaction coordinates of the HAT process.

## 6. Analysis of regioselectivity for radical addition process

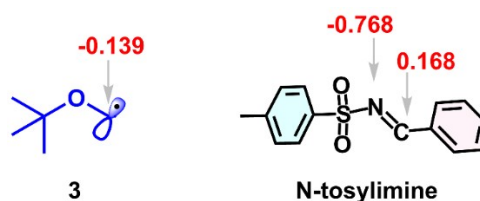

**Fig. S5** NPA charge analysis for C-center radical of **1** and N-tosylimine.

## REFERENCES

- S1. S. Sakaki, Y. Y. Ohnishi and H. Sato, Theoretical and Computational Studies of Organometallic Reactions: Successful or Not? *Chem. Rec.*, 2010, **10**, 29–45.
- S2. A. Ishikawa, Y. Nakao, H. Sato and S. Sakaki, Oxygen Atom Transfer Reactions of Iridium and Osmium Complexes: Theoretical Study of Characteristic Features and Significantly Large Differences Between These Two Complexes, *Inorg. Chem.*, 2009, **48**, 8154–8163.
- S3. A. Ishikawa, Y. Nakao, H. Sato and S. Sakaki, Pd(ii)-promoted Direct Cross-Coupling Reaction of Arenes via Highly Regioselective Aromatic C–H Activation: a Theoretical Study, *Dalton Trans.*, 2010, **39**, 3279–3289.
- S4. A. V. Marenich, J. Ho, M. L. Coote, C. J. Cramer and D. G. Truhlar, Computational Electrochemistry: Prediction of Liquid-Phase Reduction Potentials, *Phys. Chem. Chem. Phys.*, 2014, **16**, 15068–15106.

## CARTESIAN COORDINATES OF OPTIMIZED STRUCTURES

\*[W<sub>10</sub>O<sub>32</sub>]<sup>4-</sup>

(U)M06/BSII SCF energy in solution: -3080.2099382 a.u.

(U)M06/BSI SCF energy: -3085.8145166 a.u.

(U)M06/BSI SCF Gibbs free energy: -3085.77942 a.u.

|   |             |             |             |
|---|-------------|-------------|-------------|
| O | -6.08782300 | 0.00449500  | 0.01405400  |
| O | -3.89209800 | 1.97494600  | 0.00700100  |
| O | -3.88563600 | 0.16386200  | 1.81762600  |
| O | -3.93341900 | -1.84392100 | 0.00660200  |
| O | -3.89269400 | 0.16089900  | -1.80552000 |
| O | -2.07601400 | 4.07802400  | -0.00108100 |
| O | -1.90004000 | 1.94114700  | 1.82906600  |
| O | 0.09794700  | 2.39655000  | -0.00375800 |
| O | -1.90667900 | 1.93968600  | -1.82870200 |
| O | -2.22190600 | 0.06949500  | 3.98853200  |
| O | -1.98923500 | -1.79509600 | 1.85377300  |
| O | -0.03665000 | 0.04477300  | 2.28379000  |
| O | -1.99449300 | 0.06491900  | 0.00291100  |
| O | -2.24403000 | -3.99623000 | 0.00210800  |
| O | -1.99481300 | -1.79757700 | -1.84844800 |
| O | -2.24255000 | 0.06490500  | -3.98832300 |
| W | -4.36177000 | -0.05024500 | 0.01205900  |
| W | -1.71322500 | 2.40343000  | -0.00075700 |
| W | -1.91550700 | 0.05921300  | 2.30471500  |
| W | -1.94683200 | -2.31255600 | 0.00150800  |
| W | -1.94293000 | 0.05775100  | -2.30371200 |
| W | 2.10348000  | 2.33816800  | -0.00234400 |
| W | 1.89898600  | -0.01459400 | 2.31083100  |
| O | -0.07646000 | -2.30653400 | 0.00128900  |
| O | -0.04859700 | 0.04227900  | -2.28644100 |
| O | 3.90540100  | 1.80104300  | 0.00107500  |
| O | 1.94346500  | 1.85485300  | -1.84238200 |
| O | 1.94674700  | -0.02899800 | -0.00720900 |
| O | 2.34416000  | 4.03336300  | -0.00234900 |
| O | 1.94087300  | 1.85561100  | 1.83911800  |
| O | 3.80118400  | -0.05992500 | 1.84164000  |
| O | 1.82956800  | -1.87304400 | 1.85524300  |
| O | 2.13359500  | -0.01538000 | 4.00576900  |
| W | 1.83417500  | -2.37502300 | 0.00071900  |
| W | 1.86591100  | -0.01689400 | -2.30934900 |
| W | 4.27505000  | -0.15212200 | -0.01662300 |
| O | 3.78280900  | -1.96848300 | 0.00446200  |
| O | 2.04096900  | -4.07315600 | 0.00192500  |
| O | 1.82961900  | -1.87794300 | -1.85243700 |
| O | 3.80563900  | -0.06340200 | -1.84836900 |

|   |            |             |             |
|---|------------|-------------|-------------|
| O | 2.12043400 | -0.02191700 | -4.00156100 |
| O | 6.00036900 | -0.18769500 | -0.01208800 |

**[W<sub>10</sub>O<sub>32</sub>]<sup>4-</sup>**

(U)M06/BSII SCF energy in solution: -3080.2950517 a.u.

(U)M06/BSI SCF energy: -3085.9012962 a.u.

(U)M06/BSI SCF Gibbs free energy: -3085.861015 a.u.

|   |             |             |             |
|---|-------------|-------------|-------------|
| O | -6.01098300 | 0.14901300  | -0.01445700 |
| O | -3.81886400 | 1.19874800  | -1.47548200 |
| O | -3.81923400 | 1.47407900  | 1.20185600  |
| O | -3.84187400 | -1.16386800 | 1.42413200  |
| O | -3.84215200 | -1.42869200 | -1.15787200 |
| O | -2.10698800 | 2.53354800  | -3.11519900 |
| O | -1.88619800 | 2.62611600  | -0.26924500 |
| O | 0.03186800  | 1.45042200  | -1.78773700 |
| O | -1.89383900 | -0.27887800 | -2.61372900 |
| O | -2.10684800 | 3.11308200  | 2.53633400  |
| O | -1.89391800 | 0.25772600  | 2.61647500  |
| O | 0.03244200  | 1.78259900  | 1.45850000  |
| O | -1.97036000 | 0.04206800  | -0.00326900 |
| O | -2.22716300 | -2.54945300 | 3.12024300  |
| O | -1.88842300 | -2.60244500 | 0.26660900  |
| O | -2.22860600 | -3.12861200 | -2.54027900 |
| W | -4.28396900 | 0.17058400  | -0.01640100 |
| W | -1.79689300 | 1.47472800  | -1.80467300 |
| W | -1.79569100 | 1.80996100  | 1.46862700  |
| W | -2.03952600 | -1.46638300 | 1.80793200  |
| W | -2.04093000 | -1.80299000 | -1.47360000 |
| W | 2.03953300  | 1.46637900  | -1.80793600 |
| W | 2.04092500  | 1.80299900  | 1.47359100  |
| O | -0.03186300 | -1.45042300 | 1.78772500  |
| O | -0.03244400 | -1.78261000 | -1.45851300 |
| O | 3.84187800  | 1.16386500  | -1.42412500 |
| O | 1.89392900  | -0.25773500 | -2.61647500 |
| O | 1.97035700  | -0.04206600 | 0.00326000  |
| O | 2.22717700  | 2.54944000  | -3.12025300 |
| O | 1.88842200  | 2.60245100  | -0.26662200 |
| O | 3.84214100  | 1.42869100  | 1.15787400  |
| O | 1.89383200  | 0.27888400  | 2.61372600  |
| O | 2.22859500  | 3.12862700  | 2.54026300  |
| W | 1.79690000  | -1.47472100 | 1.80468400  |
| W | 1.79568600  | -1.80996600 | -1.46862200 |
| W | 4.28396700  | -0.17059100 | 0.01640000  |
| O | 3.81886100  | -1.19874400 | 1.47549400  |



|   |            |             |             |
|---|------------|-------------|-------------|
| O | 2.10696400 | -2.53353200 | 3.11522400  |
| O | 1.88620200 | -2.62610900 | 0.26924900  |
| O | 3.81924500 | -1.47408700 | -1.20184800 |
| O | 2.10684500 | -3.11309000 | -2.53632500 |
| O | 6.01098100 | -0.14901200 | 0.01446300  |

**[HW<sub>10</sub>O<sub>32</sub>]<sup>4-</sup>**

(U)M06/BSII SCF energy in solution: -3080.8978247a.u.

(U)M06/BSI SCF energy: -3086.4920014 a.u.

(U)M06/BSI SCF Gibbs free energy: -3086.443147 a.u.

|   |             |             |             |
|---|-------------|-------------|-------------|
| O | -6.06326200 | -0.00980300 | 0.00113600  |
| O | -3.93901200 | 2.01278800  | 0.00435600  |
| O | -3.87507900 | 0.08252500  | 1.82454700  |
| O | -3.90799200 | -1.86094200 | -0.03954300 |
| O | -3.87438700 | 0.14027600  | -1.81925600 |
| O | -2.11351100 | 4.04629200  | 0.06943200  |
| O | -1.89389300 | 1.88808900  | 1.89050400  |
| O | 0.07963700  | 2.38778000  | 0.04916500  |
| O | -1.90312600 | 1.95955500  | -1.80313300 |
| O | -2.21514000 | -0.03399200 | 4.00469000  |
| O | -1.96546600 | -1.84517000 | 1.80263900  |
| O | -0.02733500 | -0.01796200 | 2.28925800  |
| O | -2.01241500 | 0.10197800  | 0.01366600  |
| O | -2.20331700 | -4.01542100 | -0.07976500 |
| O | -1.96076800 | -1.76779300 | -1.87148500 |
| O | -2.23117800 | 0.14173800  | -4.00276300 |
| W | -4.33586200 | -0.07051900 | 0.02379200  |
| W | -1.73370400 | 2.37186500  | 0.06289500  |
| W | -1.91477800 | 0.00456600  | 2.32061700  |
| W | -1.91208300 | -2.33186800 | -0.04499600 |
| W | -1.95379900 | 0.10153300  | -2.31405000 |
| W | 2.08142900  | 2.34626000  | 0.04365900  |
| W | 1.89516900  | -0.05566500 | 2.30641700  |
| O | -0.04739000 | -2.30901200 | -0.04099600 |
| O | -0.04603300 | 0.07562900  | -2.27779700 |
| O | 3.89348700  | 1.82527500  | 0.02797500  |
| O | 1.92553400  | 1.89640200  | -1.80625300 |
| O | 1.94683600  | -0.02129000 | -0.00328400 |
| O | 2.31059800  | 4.04303100  | 0.07722200  |
| O | 1.93578900  | 1.82455100  | 1.87550200  |
| O | 3.81059100  | -0.08069900 | 1.82965900  |
| O | 1.85773000  | -1.91280200 | 1.81186100  |
| O | 2.14596200  | -0.09044000 | 3.99910500  |
| W | 1.87331100  | -2.37101400 | -0.04691000 |

|   |             |             |             |
|---|-------------|-------------|-------------|
| W | 1.85766200  | 0.03472700  | -2.30982500 |
| W | 4.27834500  | -0.11711800 | -0.02170700 |
| O | 3.80082500  | -1.94968800 | -0.04686300 |
| O | 2.07859100  | -4.06964000 | -0.08158700 |
| O | 1.84457200  | -1.83805600 | -1.88936400 |
| O | 3.79744000  | -0.00804200 | -1.85127600 |
| O | 2.11167300  | 0.06640600  | -4.00241300 |
| O | 6.00428800  | -0.14248900 | -0.02700900 |
| H | -4.15509700 | 2.30261000  | -0.89557100 |

**[HW<sub>10</sub>O<sub>32</sub>]<sup>3-</sup>**

(U)M06/BSII SCF energy in solution: -3080.744329 a.u.

(U)M06/BSI SCF energy: -3086.6517063 a.u.

(U)M06/BSI SCF Gibbs free energy: -3086.599651 a.u.

|   |             |             |             |
|---|-------------|-------------|-------------|
| O | -6.05169900 | -0.03454600 | 0.11232100  |
| O | -3.93336500 | 1.96953600  | 0.13712400  |
| O | -3.86493100 | -0.04178900 | 1.89724500  |
| O | -3.87234500 | -1.83751800 | -0.13491200 |
| O | -3.91078600 | 0.22786200  | -1.80769700 |
| O | -2.11876300 | 3.99732500  | 0.27801200  |
| O | -1.91060400 | 1.77332000  | 1.99408400  |
| O | 0.07843800  | 2.35256800  | 0.16890800  |
| O | -1.93414300 | 2.03581300  | -1.69993300 |
| O | -2.11772000 | -0.25210800 | 4.00484400  |
| O | -1.96557900 | -1.93803400 | 1.71185400  |
| O | 0.00349500  | -0.13436700 | 2.26093500  |
| O | -2.02328400 | 0.10214300  | 0.04083600  |
| O | -2.17016300 | -3.97533900 | -0.29517200 |
| O | -1.97176600 | -1.64685700 | -1.97490400 |
| O | -2.28559200 | 0.35824600  | -3.99914000 |
| W | -4.33521100 | -0.07278400 | 0.13928600  |
| W | -1.71990700 | 2.33735100  | 0.19034200  |
| W | -1.81669800 | -0.12488800 | 2.33208900  |
| W | -1.89993600 | -2.30064600 | -0.16482500 |
| W | -2.11168500 | 0.22587800  | -2.30905700 |
| W | 2.10478500  | 2.32547100  | 0.16593500  |
| W | 2.02112800  | -0.18500500 | 2.29500200  |
| O | -0.05648100 | -2.23612500 | -0.16510200 |
| O | -0.09000900 | 0.21238100  | -2.24957000 |
| O | 3.90966200  | 1.80977900  | 0.12995900  |
| O | 1.92188800  | 2.00184500  | -1.69990200 |
| O | 1.96823200  | -0.00286500 | -0.04193600 |
| O | 2.31315200  | 4.01104300  | 0.30269600  |
| O | 1.92683100  | 1.70843800  | 1.96736700  |

|   |             |             |             |
|---|-------------|-------------|-------------|
| O | 3.82062700  | -0.19657500 | 1.80350200  |
| O | 1.82868700  | -1.99803100 | 1.69555500  |
| O | 2.19237600  | -0.31116100 | 3.98470400  |
| W | 1.89617100  | -2.35416600 | -0.18598500 |
| W | 1.72804400  | 0.17052000  | -2.29715100 |
| W | 4.28266900  | -0.10113400 | -0.15154100 |
| O | 3.77547800  | -1.95099000 | -0.15226300 |
| O | 2.03965400  | -4.04647900 | -0.30589200 |
| O | 1.81554900  | -1.73552000 | -1.98555300 |
| O | 3.79563600  | 0.08004600  | -1.89992500 |
| O | 2.03745200  | 0.29103900  | -3.96960100 |
| O | 5.99632800  | -0.15298600 | -0.15069500 |
| H | -4.22265900 | 2.35503600  | -0.70492400 |

## 1

(U)M06/BSII SCF energy in solution: -272.862755 a.u.

(U)M06/BSI SCF energy: -272.7749083 a.u.

(U)M06/BSI SCF Gibbs free energy: -272.644233 a.u.

|   |             |             |             |
|---|-------------|-------------|-------------|
| C | 0.14045700  | 0.36673500  | 0.00000000  |
| C | -0.63020100 | 0.76106300  | 1.25513400  |
| H | -1.64991000 | 0.35403100  | 1.26334900  |
| H | -0.10513000 | 0.40147800  | 2.14991600  |
| H | -0.71510600 | 1.85371600  | 1.32054200  |
| C | -0.63020100 | 0.76106300  | -1.25513400 |
| H | -0.71510600 | 1.85371600  | -1.32054200 |
| H | -0.10513000 | 0.40147800  | -2.14991600 |
| H | -1.64991000 | 0.35403100  | -1.26334900 |
| C | 1.50742300  | 1.03081800  | 0.00000000  |
| H | 2.07485900  | 0.72593600  | 0.88821900  |
| H | 2.07485900  | 0.72593600  | -0.88821900 |
| H | 1.41377300  | 2.12434200  | 0.00000000  |
| O | 0.44694500  | -1.02832900 | 0.00000000  |
| C | -0.63020100 | -1.91936100 | 0.00000000  |
| H | -0.20362600 | -2.92823200 | 0.00000000  |
| H | -1.26939600 | -1.82085400 | 0.89348700  |
| H | -1.26939600 | -1.82085400 | -0.89348700 |

## 2

(U)M06/BSII SCF energy in solution: -3353.0810356 a.u.

(U)M06/BSI SCF energy: -3358.6165472 a.u.

(U)M06/BSI SCF Gibbs free energy: -3358.430697 a.u.

|   |             |             |            |
|---|-------------|-------------|------------|
| O | -5.60096700 | -1.82502700 | 0.03029400 |
| O | -3.86897100 | 0.12290500  | 1.39194300 |
| O | -3.17403500 | -2.30611100 | 1.46771200 |

|   |             |             |             |
|---|-------------|-------------|-------------|
| O | -3.16088000 | -2.56743300 | -1.22284600 |
| O | -3.85161000 | 0.05209500  | -1.19802000 |
| O | -2.54897100 | 2.13461100  | 2.74602000  |
| O | -1.59610600 | -0.52832300 | 2.67965200  |
| O | -0.10913200 | 1.53323500  | 1.62660200  |
| O | -2.29917100 | 1.85247000  | -0.02085300 |
| O | -1.15861800 | -3.35737500 | 3.00523500  |
| O | -0.96591500 | -3.22157500 | 0.16787100  |
| O | 0.63700800  | -1.67676600 | 1.71399700  |
| O | -1.66854200 | -0.67674300 | 0.06365700  |
| O | -1.11395100 | -3.66195100 | -2.68188100 |
| O | -1.63768700 | -0.81758000 | -2.55997600 |
| O | -2.62972800 | 1.83231400  | -2.86369700 |
| W | -3.92838700 | -1.40341100 | -0.01513800 |
| W | -1.84373600 | 1.03359900  | 1.63584400  |
| W | -1.18563900 | -2.18791000 | 1.75847600  |
| W | -1.15976200 | -2.38467000 | -1.54877800 |
| W | -2.00488100 | 0.81052000  | -1.63875400 |
| W | 1.84817100  | 2.02264000  | 1.57819600  |
| W | 2.49612900  | -1.21835500 | 1.68610400  |
| O | 0.64109400  | -1.87376300 | -1.54813400 |
| O | -0.20060500 | 1.30241100  | -1.63723000 |
| O | 3.68139600  | 2.12432700  | 1.20228800  |
| O | 1.43758200  | 2.83058500  | -0.10329300 |
| O | 2.14879000  | 0.29006300  | -0.01802200 |
| O | 1.74602200  | 3.28979700  | 2.72379000  |
| O | 2.11432200  | 0.43856200  | 2.60631200  |
| O | 4.28830600  | -0.42919600 | 1.30867700  |
| O | 2.74260800  | -2.25382400 | 0.09450900  |
| O | 3.05304800  | -2.25209300 | 2.92993300  |
| W | 2.49014300  | -1.40437400 | -1.60829800 |
| W | 1.67921200  | 1.79765900  | -1.71485500 |
| W | 4.42033000  | 0.81575400  | -0.10881300 |
| O | 4.29338200  | -0.58707600 | -1.34902500 |
| O | 3.02011600  | -2.55274000 | -2.75887900 |
| O | 2.04600900  | 0.16007200  | -2.63366100 |
| O | 3.59966600  | 1.97011700  | -1.41148900 |
| O | 1.58124300  | 2.95815500  | -2.96718100 |
| O | 6.08678900  | 1.25767100  | -0.14521300 |
| C | -5.32223500 | 4.51758300  | -0.29424900 |
| C | -6.10070800 | 5.82704400  | -0.35805100 |
| H | -7.04325500 | 5.67765500  | -0.90519700 |
| H | -6.34351100 | 6.17138400  | 0.65767700  |
| H | -5.51627300 | 6.60717900  | -0.86654500 |

|   |             |            |             |
|---|-------------|------------|-------------|
| C | -4.98487500 | 4.04594000 | -1.70470300 |
| H | -4.36559200 | 4.79284100 | -2.22228200 |
| H | -4.41219100 | 3.10961800 | -1.70969400 |
| H | -5.90989900 | 3.89387600 | -2.28093900 |
| C | -4.04861400 | 4.70557800 | 0.52233800  |
| H | -4.29608900 | 4.93078600 | 1.57006200  |
| H | -3.40759800 | 3.81404300 | 0.49891800  |
| H | -3.46081700 | 5.54024000 | 0.11339900  |
| O | -6.23511400 | 3.62412600 | 0.33588400  |
| C | -5.70106800 | 2.35917800 | 0.69567200  |
| H | -4.98789200 | 2.42922100 | 1.53005900  |
| H | -6.54828600 | 1.73947300 | 1.01329900  |
| H | -5.19959000 | 1.84684700 | -0.13936900 |

### TS1

(U)M06/BSII SCF energy in solution: -3353.0786527 a.u.

(U)M06/BSI SCF energy: -3358.5966526 a.u.

(U)M06/BSI SCF Gibbs free energy: -3358.410076 a.u.

|   |             |             |             |
|---|-------------|-------------|-------------|
| O | -5.62173900 | -1.61837500 | 0.03395700  |
| O | -3.90914900 | 0.36272400  | 1.29456100  |
| O | -3.22321500 | -2.13309800 | 1.52755900  |
| O | -3.17485200 | -2.55699000 | -1.11391000 |
| O | -3.78750300 | 0.03119700  | -1.35387500 |
| O | -2.54500500 | 2.38912900  | 2.51424000  |
| O | -1.64493800 | -0.29936800 | 2.65970500  |
| O | -0.11648200 | 1.63772800  | 1.46949000  |
| O | -2.24005900 | 1.91951100  | -0.24133600 |
| O | -1.26772200 | -3.10845600 | 3.19291600  |
| O | -1.01681000 | -3.15376200 | 0.34426400  |
| O | 0.57954100  | -1.54867500 | 1.82096500  |
| O | -1.70196900 | -0.59870500 | 0.07034100  |
| O | -1.12887800 | -3.79682600 | -2.46890900 |
| O | -1.57674500 | -0.94616000 | -2.55036200 |
| O | -2.53515900 | 1.72432700  | -3.06534200 |
| W | -3.92520700 | -1.28189000 | -0.00027800 |
| W | -1.87387400 | 1.18146900  | 1.49536700  |
| W | -1.25271000 | -2.02283100 | 1.87184600  |
| W | -1.16649500 | -2.44253700 | -1.42834500 |
| W | -1.95944700 | 0.76217800  | -1.76633300 |
| W | 1.82988900  | 2.10531500  | 1.43984800  |
| W | 2.44650700  | -1.12103300 | 1.80666000  |
| O | 0.64544200  | -1.97015200 | -1.41902700 |
| O | -0.12869400 | 1.19824500  | -1.77149600 |
| O | 3.68548300  | 2.15468900  | 1.10733400  |

|   |             |             |             |
|---|-------------|-------------|-------------|
| O | 1.49234400  | 2.80523200  | -0.30609200 |
| O | 2.15316800  | 0.26796500  | -0.01701100 |
| O | 1.72604800  | 3.45529800  | 2.48787300  |
| O | 2.06698500  | 0.59994000  | 2.59179900  |
| O | 4.25103100  | -0.39270500 | 1.40992500  |
| O | 2.70310500  | -2.27338100 | 0.29446700  |
| O | 2.95497500  | -2.07221000 | 3.13521800  |
| W | 2.51026900  | -1.54071900 | -1.46712900 |
| W | 1.74557300  | 1.65271300  | -1.83204200 |
| W | 4.43382100  | 0.76032300  | -0.08644900 |
| O | 4.31179000  | -0.74032400 | -1.22135700 |
| O | 3.04041900  | -2.78173800 | -2.51880100 |
| O | 2.11893700  | -0.05502000 | -2.61828500 |
| O | 3.67280100  | 1.81537400  | -1.49251000 |
| O | 1.71089600  | 2.72345600  | -3.16673600 |
| O | 6.11049600  | 1.16708800  | -0.11333300 |
| C | -5.29755400 | 4.20759800  | -0.17696800 |
| C | -6.29337600 | 5.35439900  | -0.04425000 |
| H | -7.21012400 | 5.13817400  | -0.61230300 |
| H | -6.56465200 | 5.49282700  | 1.01150100  |
| H | -5.85608100 | 6.28999900  | -0.42038900 |
| C | -4.97386000 | 3.96145000  | -1.64405700 |
| H | -4.61894800 | 4.90114000  | -2.09071100 |
| H | -4.17735100 | 3.21901000  | -1.78807000 |
| H | -5.86947600 | 3.63513200  | -2.19375100 |
| C | -4.03266600 | 4.50600900  | 0.60758400  |
| H | -4.25572700 | 4.60428000  | 1.67744500  |
| H | -3.29421200 | 3.70558400  | 0.48190400  |
| H | -3.58175200 | 5.44255300  | 0.24619400  |
| O | -6.00342600 | 3.10697700  | 0.42597700  |
| C | -5.62528200 | 1.81479300  | 0.14387900  |
| H | -4.67907900 | 1.31879000  | 0.81843900  |
| H | -6.43682500 | 1.13767200  | 0.43605500  |
| H | -5.26437300 | 1.62481600  | -0.87373000 |

### 3

(U)M06/BSII SCF energy in solution: -272.2006046 a.u.

(U)M06/BSI SCF energy: -272.1128788 a.u.

(U)M06/BSI SCF Gibbs free energy: -271.994893 a.u.

|   |             |             |            |
|---|-------------|-------------|------------|
| C | 0.35704500  | 0.00791300  | 0.01310700 |
| C | 0.39480300  | -0.38104100 | 1.48334700 |
| H | -0.43292900 | 0.07656400  | 2.03951800 |
| H | 0.31478000  | -1.47041800 | 1.58849700 |
| H | 1.33875600  | -0.05462600 | 1.93916300 |

|   |             |             |             |
|---|-------------|-------------|-------------|
| C | 0.43963200  | 1.51767900  | -0.16797300 |
| H | 1.41763700  | 1.88166300  | 0.17269400  |
| H | 0.32284400  | 1.77925200  | -1.22739800 |
| H | -0.32694700 | 2.05087900  | 0.40816600  |
| C | 1.47730500  | -0.67410600 | -0.75119400 |
| H | 1.39007000  | -1.76368600 | -0.65945300 |
| H | 1.42688300  | -0.41404200 | -1.81590400 |
| H | 2.45553500  | -0.36590100 | -0.36096000 |
| O | -0.84039100 | -0.50686200 | -0.59999600 |
| C | -2.03151900 | -0.13014500 | -0.08194800 |
| H | -2.87488600 | -0.57591100 | -0.60076000 |
| H | -2.13221000 | 0.86932100  | 0.34437700  |

### **N-benzylidene-4-methylbenzenesulfonamide**

(U)M06/BSII SCF energy in solution: -1144.3345819 a.u.

(U)M06/BSI SCF energy: -1144.0952261 a.u.

(U)M06/BSI SCF Gibbs free energy: -1143.903889 a.u.

|   |             |             |             |
|---|-------------|-------------|-------------|
| S | -0.61713700 | -1.64370500 | 0.27911300  |
| O | -0.45077300 | -2.38579400 | -0.96885400 |
| O | -0.80702900 | -2.34913200 | 1.53641700  |
| C | -1.93190600 | -0.47667100 | 0.06593000  |
| C | -2.48813000 | -0.28906300 | -1.19287300 |
| C | -2.38618400 | 0.23355900  | 1.17404700  |
| C | -3.52004500 | 0.62957400  | -1.33952300 |
| H | -2.11506400 | -0.86508500 | -2.03695800 |
| C | -3.41329000 | 1.14896300  | 1.00696100  |
| H | -1.93685800 | 0.05877300  | 2.14984300  |
| C | -3.99608500 | 1.35733700  | -0.24768600 |
| H | -3.96852500 | 0.78508300  | -2.32069900 |
| H | -3.77878900 | 1.71403300  | 1.86455400  |
| N | 0.68595400  | -0.57656900 | 0.53788700  |
| C | 1.67521900  | -0.72152100 | -0.26456600 |
| H | 1.64182400  | -1.45974200 | -1.08238600 |
| C | 2.88990500  | 0.07545700  | -0.15276500 |
| C | 3.91566300  | -0.12432500 | -1.08104200 |
| C | 3.04736400  | 1.02818400  | 0.86122200  |
| C | 5.08609000  | 0.61875300  | -1.00239800 |
| H | 3.78721000  | -0.86980400 | -1.86615700 |
| C | 4.21564600  | 1.76814300  | 0.93779500  |
| H | 2.24020300  | 1.16631800  | 1.57799400  |
| C | 5.23485500  | 1.56443400  | 0.00698700  |
| H | 5.88269500  | 0.46039000  | -1.72642700 |
| H | 4.33966900  | 2.50781700  | 1.72637800  |
| H | 6.15194600  | 2.14746700  | 0.07216400  |

|   |             |            |             |
|---|-------------|------------|-------------|
| C | -5.12903100 | 2.32566200 | -0.40532700 |
| H | -5.22387000 | 2.67271500 | -1.44094500 |
| H | -6.08570300 | 1.86134900 | -0.12792700 |
| H | -5.00023900 | 3.20442500 | 0.23847900  |

#### 4

(U)M06/BSII SCF energy in solution: -1416.5451866 a.u.

(U)M06/BSI SCF energy: -1416.2242444 a.u.

(U)M06/BSI SCF Gibbs free energy: -1415.89089 a.u.

|   |             |             |             |
|---|-------------|-------------|-------------|
| S | 1.01513400  | -0.89414600 | -0.13255800 |
| O | 0.58331500  | -1.50601100 | 1.12701500  |
| O | 0.76498600  | -1.60974200 | -1.38306400 |
| C | 2.74454800  | -0.53752200 | -0.01522200 |
| C | 3.40289400  | -0.72748700 | 1.19183400  |
| C | 3.41711100  | -0.07626500 | -1.14447100 |
| C | 4.76242900  | -0.44655300 | 1.26637000  |
| H | 2.84949400  | -1.09433900 | 2.05349600  |
| C | 4.77075900  | 0.20255300  | -1.04938700 |
| H | 2.87731200  | 0.05565600  | -2.08034700 |
| C | 5.46237300  | 0.01964300  | 0.15366300  |
| H | 5.29227000  | -0.59297400 | 2.20749500  |
| H | 5.31081800  | 0.56667500  | -1.92373300 |
| N | 0.38628200  | 0.65283800  | -0.33033900 |
| C | -0.69860900 | 0.88093400  | 0.33647800  |
| H | -1.08195900 | 0.16942300  | 1.08140900  |
| C | -1.41604300 | 2.14558200  | 0.22672900  |
| C | -2.63147800 | 2.29383700  | 0.90302800  |
| C | -0.91482200 | 3.20552800  | -0.53639700 |
| C | -3.33669700 | 3.48562900  | 0.82222400  |
| H | -3.02587800 | 1.45163000  | 1.47361900  |
| C | -1.61918600 | 4.39786500  | -0.61090200 |
| H | 0.03072900  | 3.07232000  | -1.05862100 |
| C | -2.82852300 | 4.54009500  | 0.06743000  |
| H | -4.28468400 | 3.59434200  | 1.34548100  |
| H | -1.22630500 | 5.22406100  | -1.20074500 |
| H | -3.37890300 | 5.47737600  | 0.00521200  |
| C | 6.93216600  | 0.30357500  | 0.22836100  |
| H | 7.28442400  | 0.34654500  | 1.26543700  |
| H | 7.51223400  | -0.47587500 | -0.28484500 |
| H | 7.18157900  | 1.25697700  | -0.25464900 |
| C | -3.48966500 | -2.35919900 | 0.04233300  |
| C | -2.81648300 | -2.16535300 | 1.39114700  |
| H | -1.75119700 | -1.92103900 | 1.28376800  |
| H | -3.31928300 | -1.36739300 | 1.95506400  |



|   |             |             |             |
|---|-------------|-------------|-------------|
| H | -2.88215100 | -3.09055400 | 1.97894700  |
| C | -2.74616600 | -3.38140900 | -0.80312800 |
| H | -2.86302500 | -4.37373000 | -0.34900500 |
| H | -3.16191000 | -3.41897300 | -1.81864400 |
| H | -1.66947000 | -3.17840900 | -0.86655000 |
| C | -4.94354500 | -2.76052200 | 0.21368800  |
| H | -5.48718500 | -1.99021600 | 0.77494100  |
| H | -5.42774000 | -2.88054700 | -0.76354100 |
| H | -5.01755300 | -3.70890300 | 0.76029500  |
| O | -3.57851600 | -1.07592600 | -0.63108500 |
| C | -2.47497800 | -0.53265600 | -1.16252400 |
| H | -2.67968800 | 0.38467300  | -1.70958800 |
| H | -1.64283900 | -1.16647700 | -1.47205300 |

## TS2

(U)M06/BSII SCF energy in solution: -1416.5427293 a.u.

(U)M06/BSI SCF energy: -1416.2228506 a.u.

(U)M06/BSI SCF Gibbs free energy: -1415.885035 a.u.

|   |             |             |             |
|---|-------------|-------------|-------------|
| S | 1.01852500  | -0.94026800 | -0.13556400 |
| O | 0.61780800  | -1.57667000 | 1.12545000  |
| O | 0.83047800  | -1.70453300 | -1.37415600 |
| C | 2.72501400  | -0.48787500 | -0.01085700 |
| C | 3.37785500  | -0.61246700 | 1.20716600  |
| C | 3.38720600  | -0.01961400 | -1.14344800 |
| C | 4.71973300  | -0.25723500 | 1.29046700  |
| H | 2.83371400  | -0.98831500 | 2.07085000  |
| C | 4.72268300  | 0.33344500  | -1.04032700 |
| H | 2.85341100  | 0.05827800  | -2.08875900 |
| C | 5.40769900  | 0.21898900  | 0.17506500  |
| H | 5.24469200  | -0.35262300 | 2.24090100  |
| H | 5.25424300  | 0.70280200  | -1.91787000 |
| N | 0.30626500  | 0.54605800  | -0.34772600 |
| C | -0.87796200 | 0.67083300  | 0.22762500  |
| H | -1.18462500 | -0.00903900 | 1.03503000  |
| C | -1.58308600 | 1.95661200  | 0.17936600  |
| C | -2.75881300 | 2.12049700  | 0.91853600  |
| C | -1.11239400 | 3.01467700  | -0.60490500 |
| C | -3.45054600 | 3.32346100  | 0.88118200  |
| H | -3.12936700 | 1.28872300  | 1.51871700  |
| C | -1.80531700 | 4.21646200  | -0.63926200 |
| H | -0.19445800 | 2.87450600  | -1.17289900 |
| C | -2.97447600 | 4.37463000  | 0.10235100  |
| H | -4.36347300 | 3.44315900  | 1.46189900  |
| H | -1.43151400 | 5.03910700  | -1.24672900 |

|   |             |             |             |
|---|-------------|-------------|-------------|
| H | -3.51483100 | 5.31930900  | 0.07327600  |
| C | 6.85689700  | 0.59278800  | 0.25894400  |
| H | 7.22273500  | 0.56808800  | 1.29185000  |
| H | 7.47920700  | -0.09440900 | -0.33050600 |
| H | 7.03331600  | 1.60132000  | -0.13751700 |
| C | -3.30235300 | -2.28290300 | 0.04974300  |
| C | -2.75401100 | -2.20684100 | 1.46403800  |
| H | -1.67397300 | -2.00938000 | 1.47446000  |
| H | -3.27715800 | -1.43085100 | 2.03913400  |
| H | -2.91583700 | -3.16799800 | 1.96981300  |
| C | -2.51147100 | -3.26531800 | -0.79521400 |
| H | -2.69444600 | -4.27710200 | -0.41192200 |
| H | -2.83884400 | -3.23738300 | -1.84309200 |
| H | -1.42801600 | -3.09397600 | -0.75344600 |
| C | -4.77850800 | -2.63517200 | 0.05533800  |
| H | -5.34807100 | -1.88502000 | 0.61778300  |
| H | -5.17215400 | -2.67246000 | -0.96801200 |
| H | -4.93279800 | -3.61436100 | 0.52523700  |
| O | -3.29633100 | -0.93545500 | -0.53016100 |
| C | -2.21958800 | -0.45350700 | -1.13803700 |
| H | -2.43932600 | 0.42430000  | -1.74476500 |
| H | -1.44971600 | -1.14031100 | -1.49603000 |

## 5

(U)M06/BSII SCF energy in solution: -1416.5550189 a.u.

(U)M06/BSI SCF energy: -1416.2364172 a.u.

(U)M06/BSI SCF Gibbs free energy: -1415.897961 a.u.

|   |             |             |             |
|---|-------------|-------------|-------------|
| S | 1.15363100  | -1.20830200 | -0.22875100 |
| O | 0.72836300  | -1.84093800 | 1.01900500  |
| O | 1.04779400  | -1.94574800 | -1.48737400 |
| C | 2.80780500  | -0.62413400 | -0.02660700 |
| C | 3.40839400  | -0.69265300 | 1.22363600  |
| C | 3.48466800  | -0.11323700 | -1.13320900 |
| C | 4.71418200  | -0.23803200 | 1.36498900  |
| H | 2.85493700  | -1.10384100 | 2.06491200  |
| C | 4.78303500  | 0.33824700  | -0.97069800 |
| H | 2.99161000  | -0.08022900 | -2.10286500 |
| C | 5.41553300  | 0.28286700  | 0.27770100  |
| H | 5.20002100  | -0.28930100 | 2.33898100  |
| H | 5.32719200  | 0.74051000  | -1.82542000 |
| N | 0.35113300  | 0.24694600  | -0.50517500 |
| C | -0.98744100 | 0.28359500  | -0.01168000 |
| H | -1.06309700 | -0.20070200 | 0.97711400  |
| C | -1.51381500 | 1.69356100  | 0.04326900  |

|   |             |             |             |
|---|-------------|-------------|-------------|
| C | -2.43280300 | 2.04541200  | 1.02948000  |
| C | -1.13792500 | 2.64067600  | -0.90743600 |
| C | -2.96602200 | 3.32852500  | 1.07146300  |
| H | -2.73348100 | 1.30293400  | 1.76962400  |
| C | -1.66925700 | 3.92451400  | -0.86603700 |
| H | -0.41312400 | 2.36574500  | -1.67302100 |
| C | -2.58415600 | 4.27176400  | 0.12338900  |
| H | -3.68111000 | 3.59252600  | 1.84890700  |
| H | -1.36553700 | 4.65919100  | -1.61017800 |
| H | -2.99864000 | 5.27803100  | 0.15584600  |
| C | 6.82246700  | 0.77591500  | 0.42716400  |
| H | 7.18222600  | 0.67120700  | 1.45690000  |
| H | 7.50905700  | 0.22166100  | -0.22656700 |
| H | 6.90372900  | 1.83508900  | 0.14879800  |
| C | -3.72563400 | -1.75384200 | 0.13242100  |
| C | -2.88611100 | -2.14478700 | 1.34117300  |
| H | -1.85612300 | -2.41904600 | 1.07667000  |
| H | -2.85121400 | -1.32686700 | 2.07419700  |
| H | -3.33883900 | -3.01476000 | 1.83524100  |
| C | -3.82198200 | -2.90398000 | -0.86140600 |
| H | -4.33810700 | -3.75776600 | -0.40297500 |
| H | -4.38957900 | -2.59001700 | -1.74649200 |
| H | -2.83490900 | -3.25626700 | -1.18763200 |
| C | -5.11309300 | -1.32257700 | 0.57404600  |
| H | -5.04401700 | -0.45830100 | 1.24712400  |
| H | -5.71588300 | -1.03080200 | -0.29473600 |
| H | -5.62435300 | -2.13910200 | 1.09965800  |
| O | -3.21225700 | -0.57922800 | -0.52670800 |
| C | -1.90054300 | -0.58552400 | -0.97259400 |
| H | -1.85606500 | -0.11039900 | -1.96290700 |
| H | -1.47573700 | -1.59581900 | -1.05870600 |

## 6

(U)M06/BSII SCF energy in solution: -1416.7392982 a.u.

(U)M06/BSI SCF energy: -1416.3439248 a.u.

(U)M06/BSI SCF Gibbs free energy: -1416.003312 a.u.

|   |            |             |             |
|---|------------|-------------|-------------|
| S | 1.01736100 | -0.78148200 | -1.85072800 |
| O | 0.55011200 | -2.15006100 | -1.49399800 |
| O | 1.78739100 | -0.67834800 | -3.09673500 |
| C | 2.20601900 | -0.41686100 | -0.52339100 |
| C | 2.78519600 | -1.43743100 | 0.21952100  |
| C | 2.55500900 | 0.90724600  | -0.26661200 |
| C | 3.72179900 | -1.13579400 | 1.20470300  |
| H | 2.48274000 | -2.46363300 | 0.01641700  |

|   |             |             |             |
|---|-------------|-------------|-------------|
| C | 3.48915400  | 1.20071800  | 0.71688200  |
| H | 2.06175600  | 1.69541500  | -0.83668600 |
| C | 4.08790900  | 0.18359100  | 1.46666200  |
| H | 4.17549400  | -1.93963800 | 1.78869900  |
| H | 3.75909600  | 2.23966900  | 0.91910800  |
| N | -0.06125700 | 0.35479800  | -1.78346200 |
| C | -0.88653500 | 0.31830400  | -0.59237100 |
| H | -0.35651700 | -0.08884900 | 0.29461700  |
| C | -1.33210600 | 1.71625600  | -0.21251400 |
| C | -1.97718200 | 1.95044400  | 1.00598500  |
| C | -1.12434100 | 2.79516800  | -1.07199800 |
| C | -2.40322600 | 3.22680300  | 1.35488200  |
| H | -2.15255100 | 1.10967500  | 1.67728000  |
| C | -1.55117900 | 4.07391000  | -0.72514400 |
| H | -0.60732600 | 2.59402200  | -2.00901800 |
| C | -2.19212700 | 4.29722200  | 0.48938200  |
| H | -2.90071600 | 3.38854400  | 2.31194100  |
| H | -1.37699000 | 4.90543900  | -1.40939000 |
| H | -2.52202900 | 5.29988600  | 0.76340700  |
| C | 5.07991200  | 0.51664500  | 2.54334300  |
| H | 5.58743300  | -0.38280200 | 2.91540100  |
| H | 5.85187000  | 1.21078100  | 2.18233200  |
| H | 4.59739900  | 1.00081900  | 3.40521000  |
| C | -2.68598800 | -2.13126400 | 0.94816200  |
| C | -1.25446800 | -2.31510400 | 1.44453000  |
| H | -0.53589200 | -2.36029500 | 0.61373000  |
| H | -0.97104200 | -1.48857500 | 2.11203400  |
| H | -1.17670900 | -3.25410300 | 2.01304900  |
| C | -3.07374500 | -3.29179200 | 0.03357200  |
| H | -3.08966600 | -4.23418100 | 0.59955000  |
| H | -4.07388100 | -3.11975100 | -0.38735100 |
| H | -2.35948800 | -3.41425800 | -0.79041600 |
| C | -3.64239100 | -2.06766700 | 2.13048200  |
| H | -3.38490700 | -1.21667500 | 2.77573400  |
| H | -4.67288800 | -1.92762500 | 1.77770500  |
| H | -3.59380600 | -2.98863000 | 2.72787500  |
| O | -2.88453100 | -0.88071700 | 0.29573500  |
| C | -2.09480000 | -0.59931000 | -0.85094100 |
| H | -2.75021800 | -0.10410500 | -1.58405000 |
| H | -1.70538600 | -1.51449300 | -1.31212000 |

7

(U)M06/BSII SCF energy in solution: -4497.5197461 a.u.

(U)M06/BSI SCF energy: -4502.870248 a.u.

(U)M06/BSI SCF Gibbs free energy: -4502.452573 a.u.

|   |             |             |             |
|---|-------------|-------------|-------------|
| O | 4.49019000  | 1.83077200  | -1.84087800 |
| O | 3.25650600  | 0.40754900  | 0.34473200  |
| O | 2.29156000  | 2.82831600  | -0.37821700 |
| O | 1.80829300  | 1.84586900  | -2.81463600 |
| O | 2.73940600  | -0.48080400 | -2.08299400 |
| O | 2.42419600  | -0.82241700 | 2.59525800  |
| O | 1.18205300  | 1.54851200  | 1.73650900  |
| O | -0.21473700 | -0.80661200 | 1.82795800  |
| O | 1.63460100  | -1.74869700 | 0.02686700  |
| O | 0.46064800  | 4.21841500  | 1.08833600  |
| O | -0.15840400 | 2.97013100  | -1.42586500 |
| O | -1.32446600 | 2.14283400  | 0.87796800  |
| O | 0.84713400  | 0.64863600  | -0.62990000 |
| O | -0.52055500 | 2.25362900  | -4.18689600 |
| O | 0.25024800  | -0.29114300 | -3.08146900 |
| O | 1.50591200  | -2.84393900 | -2.61153200 |
| W | 2.91405700  | 1.40480300  | -1.33288000 |
| W | 1.43636900  | -0.30842600 | 1.29727900  |
| W | 0.35778800  | 2.65146600  | 0.40843000  |
| W | -0.11362200 | 1.54531500  | -2.69169700 |
| W | 1.15103500  | -1.39224700 | -1.78780200 |
| W | -2.10275900 | -1.32384700 | 2.38381600  |
| W | -3.19350100 | 1.64331700  | 1.44828000  |
| O | -1.85307900 | 1.03092800  | -2.09816100 |
| O | -0.72065600 | -1.87341400 | -1.19343600 |
| O | -3.95146800 | -1.59524600 | 2.46775500  |
| O | -1.90865000 | -2.72581200 | 1.11192600  |
| O | -2.86209200 | -0.41091000 | 0.35589100  |
| O | -1.66754600 | -2.02070000 | 3.87857500  |
| O | -2.32449800 | 0.54017200  | 2.76284600  |
| O | -4.80210600 | 0.74482100  | 1.71964200  |
| O | -3.66813400 | 1.99779400  | -0.37169500 |
| O | -3.54544200 | 3.09472300  | 2.27448200  |
| W | -3.62111300 | 0.54596200  | -1.63450600 |
| W | -2.40458600 | -2.37789000 | -0.72624800 |
| W | -5.02521600 | -1.07289600 | 0.87737500  |
| O | -5.25404100 | -0.12358500 | -0.72960500 |
| O | -4.45635100 | 1.14441300  | -2.99766200 |
| O | -3.23504900 | -1.27223700 | -2.07348700 |
| O | -4.35364600 | -2.54160700 | 0.01593000  |
| O | -2.50085800 | -3.94234800 | -1.40436800 |
| O | -6.62090400 | -1.50876400 | 1.34847000  |
| H | 4.22177800  | 0.17491400  | 0.67128300  |

|   |            |             |             |
|---|------------|-------------|-------------|
| S | 6.62057800 | 0.63028900  | 2.07682100  |
| O | 6.62365400 | 0.13665000  | 3.47166000  |
| O | 7.97604300 | 0.92657300  | 1.55155500  |
| C | 5.70174500 | 2.15969000  | 2.08234200  |
| C | 4.40443900 | 2.17648300  | 2.59055900  |
| C | 6.26482300 | 3.30644300  | 1.54325500  |
| C | 3.66173400 | 3.34553600  | 2.52398200  |
| H | 3.96690400 | 1.26326600  | 2.99487900  |
| C | 5.51491400 | 4.47898200  | 1.50039900  |
| H | 7.27550100 | 3.25259600  | 1.14216400  |
| C | 4.20320600 | 4.50968300  | 1.97062300  |
| H | 2.62133600 | 3.33859900  | 2.85184600  |
| H | 5.94291200 | 5.38261400  | 1.05826600  |
| C | 6.17276900 | -2.64676000 | 1.39043600  |
| C | 5.07419200 | -2.79097400 | 2.23803500  |
| C | 7.08615700 | -3.69808400 | 1.29359800  |
| C | 4.89084000 | -3.96447300 | 2.96221300  |
| H | 4.36550200 | -1.96684900 | 2.33138300  |
| C | 6.91068500 | -4.87090400 | 2.02256800  |
| H | 7.93837200 | -3.59069400 | 0.62012900  |
| C | 5.80610800 | -5.00945700 | 2.85967500  |
| H | 4.01892000 | -4.05682600 | 3.60966000  |
| H | 7.63797900 | -5.68168800 | 1.93417000  |
| H | 5.65900500 | -5.92885700 | 3.43015000  |
| C | 3.35220300 | 5.73716400  | 1.84167900  |
| H | 2.95567200 | 6.06286800  | 2.81509400  |
| H | 3.91416700 | 6.57476300  | 1.40374500  |
| H | 2.48004900 | 5.52458200  | 1.20689000  |
| C | 6.32159700 | -1.40863700 | 0.52241700  |
| H | 7.40095200 | -1.26106900 | 0.32121800  |
| C | 5.64411100 | -1.65239100 | -0.82792500 |
| H | 5.77277700 | -0.75560400 | -1.45679500 |
| H | 4.56182800 | -1.77502000 | -0.66070600 |
| O | 6.22372000 | -2.78735000 | -1.44334200 |
| C | 5.35999800 | -3.66550500 | -2.15796500 |
| C | 4.73668800 | -2.94746300 | -3.34873200 |
| H | 4.10498700 | -3.63267200 | -3.93153300 |
| H | 4.10026300 | -2.11142600 | -3.02924900 |
| H | 5.53208700 | -2.55112200 | -3.99834100 |
| C | 4.29498000 | -4.28159400 | -1.25393800 |
| H | 3.55613100 | -3.55249900 | -0.89923700 |
| H | 3.73320400 | -5.04656400 | -1.80901700 |
| H | 4.77197700 | -4.74587900 | -0.37854900 |
| C | 6.30336200 | -4.76294200 | -2.63571800 |

|   |            |             |             |
|---|------------|-------------|-------------|
| H | 6.76748100 | -5.25513900 | -1.76872500 |
| H | 5.76212100 | -5.51578600 | -3.22673400 |
| H | 7.10138000 | -4.32983800 | -3.25574800 |
| N | 5.71755900 | -0.20893600 | 1.06292000  |

### TS3

(U)M06/BSII SCF energy in solution: -4497.5235839 a.u.

(U)M06/BSI SCF energy: -4502.864302 a.u.

(U)M06/BSI SCF Gibbs free energy: -4502.44714 a.u.

|   |             |             |             |
|---|-------------|-------------|-------------|
| O | 4.05850400  | -3.08953700 | -0.95421000 |
| O | 3.07167700  | -0.39573200 | -1.06262500 |
| O | 1.74735500  | -2.35941300 | -2.40407800 |
| O | 1.40349900  | -3.61156200 | -0.07147900 |
| O | 2.66654700  | -1.70074200 | 1.18790200  |
| O | 2.43180700  | 2.20487600  | -1.36935900 |
| O | 0.85532500  | 0.17378400  | -2.60565600 |
| O | -0.20152800 | 1.82034700  | -0.70029200 |
| O | 1.71545200  | 0.82538600  | 0.97595000  |
| O | -0.27822700 | -1.91866800 | -4.19561200 |
| O | -0.70110800 | -3.04433700 | -1.59567600 |
| O | -1.72252500 | -0.62263100 | -2.26258500 |
| O | 0.63204700  | -1.09168900 | -0.38841500 |
| O | -0.96040100 | -4.73622000 | 0.71123400  |
| O | 0.16556100  | -2.38118200 | 1.92722900  |
| O | 1.77204200  | -0.55271300 | 3.48248000  |
| W | 2.56456500  | -2.26693500 | -0.77901800 |
| W | 1.36333000  | 0.94404500  | -0.92489300 |
| W | -0.13447000 | -1.46534900 | -2.55686000 |
| W | -0.44822300 | -3.16625300 | 0.28894500  |
| W | 1.21401800  | -0.77523100 | 1.88401100  |
| W | -1.98798700 | 2.74845900  | -0.42489000 |
| W | -3.49933900 | 0.29541700  | -2.02620000 |
| O | -2.09872300 | -2.22226600 | 0.51835400  |
| O | -0.57252400 | 0.15342000  | 2.10649400  |
| O | -3.77769200 | 3.15597600  | -0.06262000 |
| O | -1.59819000 | 2.59475700  | 1.43317700  |
| O | -2.88402700 | 0.67407200  | 0.21579900  |
| O | -1.44954100 | 4.30850100  | -0.85947700 |
| O | -2.48176900 | 1.92636300  | -2.08215900 |
| O | -4.96171500 | 1.21088600  | -1.32157200 |
| O | -4.02605100 | -1.30185900 | -1.11472300 |
| O | -4.05537200 | 0.08199000  | -3.62608700 |
| W | -3.77544400 | -1.40166000 | 0.79246700  |
| W | -2.16079300 | 0.99627400  | 2.36841300  |

|   |             |             |             |
|---|-------------|-------------|-------------|
| W | -4.92847300 | 1.68926400  | 0.63511400  |
| O | -5.29840900 | -0.12929400 | 0.92415100  |
| O | -4.69673600 | -2.75957400 | 1.26512400  |
| O | -3.15069200 | -0.66009000 | 2.43773500  |
| O | -4.06086100 | 1.86101600  | 2.23812800  |
| O | -2.04403200 | 1.44760200  | 4.01245300  |
| O | -6.44393500 | 2.47570700  | 0.85009400  |
| H | 4.14232800  | -0.06961400 | -1.15778200 |
| S | 6.24910300  | 0.99306900  | -2.33832900 |
| O | 7.61937200  | 0.50421400  | -2.60149700 |
| O | 5.33144900  | 1.07449900  | -3.47286900 |
| C | 6.51033300  | 2.68024100  | -1.74755100 |
| C | 7.79334900  | 3.18965300  | -1.60556700 |
| C | 5.40558200  | 3.41714300  | -1.32205300 |
| C | 7.97968200  | 4.43961800  | -1.01861800 |
| H | 8.63238000  | 2.57984500  | -1.93755900 |
| C | 5.60553000  | 4.65607500  | -0.73221100 |
| H | 4.39977400  | 3.00113900  | -1.42357200 |
| C | 6.89157700  | 5.17773400  | -0.55873100 |
| H | 8.98993200  | 4.83828700  | -0.88866500 |
| H | 4.74392000  | 5.22054300  | -0.37096700 |
| C | 6.04187000  | 1.20652800  | 1.10550400  |
| C | 4.72295800  | 1.49274800  | 1.45904000  |
| C | 7.06758400  | 1.92469300  | 1.71572100  |
| C | 4.43059300  | 2.47833400  | 2.39326000  |
| H | 3.90326900  | 0.94666000  | 0.99504800  |
| C | 6.78360300  | 2.92311300  | 2.64536500  |
| H | 8.10194600  | 1.70551600  | 1.44106800  |
| C | 5.46330300  | 3.20207000  | 2.98860600  |
| H | 3.38710900  | 2.66906600  | 2.64260600  |
| H | 7.60014500  | 3.48904800  | 3.10021400  |
| H | 5.23794400  | 3.98311900  | 3.71683100  |
| C | 7.08456300  | 6.48084600  | 0.16089400  |
| H | 8.11153600  | 6.85788400  | 0.05019900  |
| H | 6.39697500  | 7.25680900  | -0.20563500 |
| H | 6.88758600  | 6.36640000  | 1.23769800  |
| C | 6.32888200  | 0.11720300  | 0.09027200  |
| H | 7.40711100  | 0.14689400  | -0.15291400 |
| C | 6.05721500  | -1.25381700 | 0.69389100  |
| H | 6.23243200  | -2.02589800 | -0.07095700 |
| H | 4.99818600  | -1.31633200 | 0.98409700  |
| O | 6.91657400  | -1.43834200 | 1.80883000  |
| C | 6.37905600  | -2.15156300 | 2.91551400  |
| C | 5.87203200  | -3.52562800 | 2.48780900  |



|   |            |             |             |
|---|------------|-------------|-------------|
| H | 5.55306700 | -4.10729100 | 3.36533500  |
| H | 5.01130100 | -3.44428000 | 1.81159700  |
| H | 6.66929100 | -4.07787100 | 1.96826000  |
| C | 5.27492400 | -1.35964500 | 3.60962300  |
| H | 4.36540600 | -1.28462700 | 3.00026400  |
| H | 4.98833400 | -1.85135300 | 4.55121400  |
| H | 5.62565000 | -0.34188700 | 3.83334800  |
| C | 7.57176500 | -2.29872400 | 3.85182700  |
| H | 7.95036500 | -1.30362700 | 4.12389000  |
| H | 7.28917900 | -2.83473500 | 4.76944600  |
| H | 8.38070900 | -2.84993100 | 3.35119800  |
| N | 5.52932300 | 0.24327500  | -1.12775800 |

## 8

(U)M06/BSII SCF energy in solution: -1417.2234441 a.u.

(U)M06/BSI SCF energy: -1416.8967518 a.u.

(U)M06/BSI SCF Gibbs free energy: -1416.544334 a.u.

|   |             |             |             |
|---|-------------|-------------|-------------|
| S | 1.13653600  | -1.21960900 | -1.60273100 |
| O | 0.45101400  | -2.39461800 | -1.06906300 |
| O | 1.74191400  | -1.26086900 | -2.92512700 |
| C | 2.33096100  | -0.71496000 | -0.39294700 |
| C | 2.39112500  | -1.36766500 | 0.83081600  |
| C | 3.20468300  | 0.32539700  | -0.70329200 |
| C | 3.34287600  | -0.96455600 | 1.76175900  |
| H | 1.70281000  | -2.18449200 | 1.03997100  |
| C | 4.14669000  | 0.71094000  | 0.23470200  |
| H | 3.13845700  | 0.81764000  | -1.67177900 |
| C | 4.22888600  | 0.07397300  | 1.47938600  |
| H | 3.40034500  | -1.46899700 | 2.72597800  |
| H | 4.83803900  | 1.52212000  | 0.00543700  |
| C | -0.85218900 | 0.29071000  | -0.57059800 |
| H | -0.40776900 | -0.15111300 | 0.33512200  |
| C | -1.12868300 | 1.75246800  | -0.30214000 |
| C | -1.76979200 | 2.11947100  | 0.88398100  |
| C | -0.79914600 | 2.74827000  | -1.22002500 |
| C | -2.07657300 | 3.44897800  | 1.14202200  |
| H | -2.03934900 | 1.34683500  | 1.60239600  |
| C | -1.10744700 | 4.08094800  | -0.96332500 |
| H | -0.27107600 | 2.48830600  | -2.13585400 |
| C | -1.74801600 | 4.43594500  | 0.21731000  |
| H | -2.57333500 | 3.71650300  | 2.07333700  |
| H | -0.83841600 | 4.84530500  | -1.69078600 |
| H | -1.98659600 | 5.47868300  | 0.42009900  |
| C | 5.25490300  | 0.51246100  | 2.47960400  |

|   |             |             |             |
|---|-------------|-------------|-------------|
| H | 5.22179200  | -0.09779000 | 3.38919700  |
| H | 6.26931300  | 0.44341800  | 2.06501400  |
| H | 5.10136600  | 1.55969200  | 2.77265300  |
| C | -3.21659800 | -1.68643800 | 0.92088100  |
| C | -1.90403500 | -2.12569400 | 1.55982900  |
| H | -1.15434600 | -2.41486300 | 0.81057300  |
| H | -1.49090900 | -1.32158700 | 2.18622300  |
| H | -2.07779100 | -2.99723000 | 2.20545300  |
| C | -3.80036900 | -2.80168600 | 0.06217600  |
| H | -4.05157200 | -3.66952500 | 0.68620600  |
| H | -4.71592200 | -2.45443600 | -0.43351200 |
| H | -3.09580600 | -3.14662700 | -0.70563200 |
| C | -4.21292600 | -1.28117000 | 1.99377000  |
| H | -3.80994700 | -0.45873900 | 2.59933600  |
| H | -5.14819700 | -0.93935000 | 1.53354800  |
| H | -4.43526900 | -2.12646800 | 2.65759400  |
| O | -3.05720100 | -0.48776100 | 0.14560200  |
| C | -2.13047600 | -0.49691400 | -0.90349200 |
| H | -2.60313400 | -0.01941100 | -1.78008200 |
| H | -1.83601100 | -1.51470600 | -1.19721100 |
| N | 0.12983700  | 0.11895600  | -1.64699900 |
| H | -0.23919100 | 0.21098000  | -2.59439100 |

## 9

(U)M06/BSII SCF energy in solution: -1416.545325 a.u.

(U)M06/BSI SCF energy: -1416.2208153 a.u.

(U)M06/BSI SCF Gibbs free energy: -1415.886295 a.u.

|   |             |             |             |
|---|-------------|-------------|-------------|
| S | 1.21646400  | -0.88357300 | 0.73884600  |
| O | 1.14940000  | -0.80906100 | 2.19821800  |
| O | 0.86564400  | -2.12126700 | 0.05575800  |
| C | 2.83897500  | -0.38683100 | 0.22975600  |
| C | 3.73800600  | 0.09584200  | 1.17114000  |
| C | 3.18523200  | -0.49468200 | -1.11494200 |
| C | 5.00728700  | 0.47825700  | 0.75329600  |
| H | 3.43841300  | 0.16168300  | 2.21481700  |
| C | 4.45319400  | -0.10331200 | -1.51369300 |
| H | 2.46301700  | -0.88530500 | -1.82948500 |
| C | 5.38180100  | 0.38465000  | -0.58743800 |
| H | 5.72395100  | 0.85640000  | 1.48228700  |
| H | 4.73783200  | -0.17918700 | -2.56342000 |
| N | 0.27940400  | 0.32542800  | 0.01146700  |
| C | -0.56205100 | 0.89335800  | 0.80323700  |
| H | -0.54837900 | 0.70350800  | 1.88677500  |
| C | -1.54526100 | 1.85590000  | 0.31735900  |

|   |             |             |             |
|---|-------------|-------------|-------------|
| C | -2.43479200 | 2.43734300  | 1.22677600  |
| C | -1.62944400 | 2.19095800  | -1.03962700 |
| C | -3.40320300 | 3.33080800  | 0.78912600  |
| H | -2.36309700 | 2.17439400  | 2.28310100  |
| C | -2.59528900 | 3.08567200  | -1.47415100 |
| H | -0.92686900 | 1.73524100  | -1.73513200 |
| C | -3.48456200 | 3.65374100  | -0.56255300 |
| H | -4.09513000 | 3.77641900  | 1.50106100  |
| H | -2.65999000 | 3.34365900  | -2.52955000 |
| H | -4.24382200 | 4.35292700  | -0.90860600 |
| C | 6.75888500  | 0.77471200  | -1.03248800 |
| H | 7.26009200  | 1.40774300  | -0.29103200 |
| H | 7.38988400  | -0.11155100 | -1.18739200 |
| H | 6.73429000  | 1.31995700  | -1.98439000 |
| C | -3.27441500 | -2.01793300 | -0.60685600 |
| C | -2.11713400 | -1.68115600 | -1.53244600 |
| H | -1.64936100 | -0.72885300 | -1.25142100 |
| H | -1.34126700 | -2.45366500 | -1.47028200 |
| H | -2.47148700 | -1.60495700 | -2.56974300 |
| C | -4.33681800 | -0.92961200 | -0.62407200 |
| H | -4.82728000 | -0.92372000 | -1.60588400 |
| H | -5.10562900 | -1.11820600 | 0.13768700  |
| H | -3.91446500 | 0.07221700  | -0.46445200 |
| C | -3.88207200 | -3.36228400 | -0.96453200 |
| H | -3.12476400 | -4.15066400 | -0.87744900 |
| H | -4.71245600 | -3.60487200 | -0.28916900 |
| H | -4.25947000 | -3.35132000 | -1.99493900 |
| O | -2.73647300 | -2.23049700 | 0.72026000  |
| C | -2.44937600 | -1.17865100 | 1.49757400  |
| H | -1.88444100 | -1.45579100 | 2.38532800  |
| H | -3.16118200 | -0.35096100 | 1.55278300  |

#### TS4

(U)M06/BSII SCF energy in solution: -1416.5357607 a.u.

(U)M06/BSI SCF energy: -1416.2128311 a.u.

(U)M06/BSI SCF Gibbs free energy: -1415.877545 a.u.

|   |            |             |             |
|---|------------|-------------|-------------|
| S | 0.87365100 | -0.96485600 | 1.27300800  |
| O | 1.04342100 | -0.57480800 | 2.67329000  |
| O | 0.50316400 | -2.33136300 | 0.93812600  |
| C | 2.36938800 | -0.56967600 | 0.39759300  |
| C | 3.29769800 | 0.29203500  | 0.96747000  |
| C | 2.56866300 | -1.11284900 | -0.86789200 |
| C | 4.44780800 | 0.60803100  | 0.25441100  |
| H | 3.11834700 | 0.69414300  | 1.96292600  |

|   |             |             |             |
|---|-------------|-------------|-------------|
| C | 3.72091100  | -0.78465400 | -1.56594300 |
| H | 1.82567700  | -1.78962800 | -1.28706700 |
| C | 4.67615400  | 0.07588200  | -1.01567900 |
| H | 5.18690700  | 1.27919400  | 0.69216600  |
| H | 3.89037400  | -1.20359600 | -2.55816300 |
| N | -0.23134300 | 0.04995800  | 0.49134900  |
| C | -0.30545000 | 1.27171200  | 0.98186600  |
| H | 0.15217200  | 1.52238900  | 1.94919200  |
| C | -1.08280300 | 2.29298800  | 0.32586000  |
| C | -1.29253700 | 3.52518100  | 0.96823600  |
| C | -1.65579300 | 2.08885500  | -0.94358100 |
| C | -2.05761900 | 4.51426600  | 0.37020400  |
| H | -0.84877400 | 3.69117000  | 1.95036000  |
| C | -2.42225800 | 3.07977700  | -1.53509500 |
| H | -1.46451600 | 1.14744400  | -1.45733200 |
| C | -2.62995700 | 4.29497900  | -0.88154500 |
| H | -2.21274700 | 5.46264400  | 0.88176300  |
| H | -2.85719300 | 2.91111000  | -2.51915800 |
| H | -3.23227200 | 5.07110500  | -1.35018800 |
| C | 5.93221000  | 0.39672400  | -1.76825800 |
| H | 6.37884200  | 1.33808300  | -1.42692600 |
| H | 6.68690900  | -0.39049200 | -1.63189700 |
| H | 5.74587500  | 0.47952100  | -2.84618000 |
| C | -2.98039100 | -2.27185200 | -0.68246900 |
| C | -1.73409100 | -2.22621900 | -1.54985400 |
| H | -1.21111200 | -1.26830100 | -1.43464500 |
| H | -1.03923000 | -3.02052000 | -1.25147700 |
| H | -2.00919500 | -2.36403600 | -2.60421500 |
| C | -3.96939200 | -1.17691500 | -1.04746600 |
| H | -4.39327600 | -1.39602100 | -2.03562500 |
| H | -4.79563700 | -1.13948600 | -0.32498900 |
| H | -3.50463400 | -0.18383400 | -1.10610500 |
| C | -3.64312500 | -3.63472700 | -0.74651800 |
| H | -2.94706800 | -4.40782400 | -0.40027000 |
| H | -4.53754800 | -3.66369600 | -0.11145100 |
| H | -3.93856700 | -3.86496800 | -1.77777100 |
| O | -2.56337200 | -2.16876200 | 0.70985800  |
| C | -2.18924900 | -1.00705900 | 1.20737600  |
| H | -1.86083900 | -1.06793900 | 2.24349900  |
| H | -2.65821900 | -0.08787900 | 0.85348500  |

## 10

(U)M06/BSII SCF energy in solution: -1416.5730561 a.u.

(U)M06/BSI SCF energy: -1416.2506432 a.u.

(U)M06/BSI SCF Gibbs free energy: -1415.909621 a.u.

|   |             |             |             |
|---|-------------|-------------|-------------|
| S | 0.62325900  | -1.56965900 | -1.09946600 |
| O | 0.40198900  | -1.73458700 | -2.53301000 |
| O | 1.53592500  | -2.44765600 | -0.38818500 |
| C | -0.94866800 | -1.56292000 | -0.28360900 |
| C | -2.09469400 | -1.24202300 | -1.00401300 |
| C | -0.99958400 | -1.82678800 | 1.08075200  |
| C | -3.30350800 | -1.14609200 | -0.33174200 |
| H | -2.02520200 | -1.05898000 | -2.07465700 |
| C | -2.22026300 | -1.73386900 | 1.73552600  |
| H | -0.09020900 | -2.10101600 | 1.61327500  |
| C | -3.38038000 | -1.37381500 | 1.04534300  |
| H | -4.20712700 | -0.87975600 | -0.88005900 |
| H | -2.27665300 | -1.93773600 | 2.80475600  |
| N | 1.16274100  | 0.05998200  | -0.80879000 |
| C | 0.32822200  | 0.99891800  | -1.46103800 |
| H | 0.47243900  | 1.14560000  | -2.53776500 |
| C | -0.71533200 | 1.68729800  | -0.80671900 |
| C | -1.61513100 | 2.46806200  | -1.57624000 |
| C | -0.93665800 | 1.60629000  | 0.59074800  |
| C | -2.69032800 | 3.10236800  | -0.98465200 |
| H | -1.45389300 | 2.54423100  | -2.65194100 |
| C | -2.01574100 | 2.24659100  | 1.17121100  |
| H | -0.24965500 | 1.02015000  | 1.19770400  |
| C | -2.90451700 | 2.99174900  | 0.39237000  |
| H | -3.37491900 | 3.68830400  | -1.59580400 |
| H | -2.17302800 | 2.16419600  | 2.24605900  |
| H | -3.75360100 | 3.49107600  | 0.85563200  |
| C | -4.67975000 | -1.19406800 | 1.76857000  |
| H | -4.86330000 | -0.12815200 | 1.96709600  |
| H | -5.52742500 | -1.56127500 | 1.17706900  |
| H | -4.68511600 | -1.71419800 | 2.73351500  |
| C | 3.58703200  | 0.50720100  | 1.02152200  |
| C | 2.66416200  | -0.17897200 | 2.02044600  |
| H | 1.61149200  | -0.02373900 | 1.75751600  |
| H | 2.85817200  | -1.25906500 | 2.01969300  |
| H | 2.83545300  | 0.21331000  | 3.03257200  |
| C | 3.27402200  | 1.99074400  | 0.90256700  |
| H | 3.44580000  | 2.47344400  | 1.87325300  |
| H | 3.93101300  | 2.47668100  | 0.16791800  |
| H | 2.22943800  | 2.18001900  | 0.62140200  |
| C | 5.03591900  | 0.31205500  | 1.44023400  |
| H | 5.27570400  | -0.75786100 | 1.47025100  |
| H | 5.71166600  | 0.79427200  | 0.72261200  |

|   |            |             |             |
|---|------------|-------------|-------------|
| H | 5.21513200 | 0.73954600  | 2.43535500  |
| O | 3.50720100 | -0.17978200 | -0.24280300 |
| C | 2.59943800 | 0.21260500  | -1.19413500 |
| H | 2.82202000 | -0.38740000 | -2.09029100 |
| H | 2.69410800 | 1.27720900  | -1.46303100 |

## 11

(U)M06/BSII SCF energy in solution: -1416.6910744 a.u.

(U)M06/BSI SCF energy: -1416.2960354 a.u.

(U)M06/BSI SCF Gibbs free energy: -1415.955686 a.u.

|   |             |             |             |
|---|-------------|-------------|-------------|
| S | 0.75164600  | -1.74978900 | -0.89980400 |
| O | 0.55525600  | -2.24833000 | -2.26708700 |
| O | 1.66152500  | -2.49645600 | -0.02523400 |
| C | -0.84373100 | -1.66667800 | -0.11737700 |
| C | -1.96910600 | -1.35227000 | -0.87183700 |
| C | -0.92228200 | -1.81192900 | 1.26059700  |
| C | -3.17009900 | -1.11857800 | -0.22120700 |
| H | -1.88034300 | -1.24822700 | -1.95021300 |
| C | -2.14225200 | -1.60510800 | 1.89658700  |
| H | -0.02500400 | -2.07182900 | 1.82036900  |
| C | -3.26686000 | -1.21926100 | 1.16920700  |
| H | -4.04385300 | -0.80883500 | -0.79594900 |
| H | -2.21382200 | -1.70477600 | 2.98077500  |
| N | 1.17658600  | -0.08827000 | -0.89924700 |
| C | 0.25305600  | 0.71475100  | -1.64299400 |
| H | 0.20731900  | 0.53060400  | -2.72102000 |
| C | -0.76039500 | 1.46639500  | -1.02684000 |
| C | -1.77599800 | 2.08717400  | -1.82122700 |
| C | -0.90358400 | 1.66364300  | 0.38069300  |
| C | -2.82095100 | 2.79972700  | -1.26618000 |
| H | -1.71811300 | 1.96951400  | -2.90684500 |
| C | -1.96212100 | 2.37407300  | 0.91961800  |
| H | -0.17029600 | 1.21152000  | 1.04873000  |
| C | -2.94913600 | 2.95791400  | 0.11966200  |
| H | -3.56731700 | 3.24182000  | -1.93206700 |
| H | -2.02163700 | 2.47241400  | 2.00740300  |
| H | -3.77497500 | 3.52093000  | 0.55396600  |
| C | -4.54524900 | -0.84638800 | 1.85700800  |
| H | -4.66445100 | 0.24697200  | 1.85136100  |
| H | -5.42283600 | -1.26969000 | 1.34955200  |
| H | -4.56059700 | -1.18042000 | 2.90241000  |
| C | 3.41650800  | 0.80262100  | 0.95724100  |
| C | 2.51656300  | 0.15277800  | 2.00284900  |
| H | 1.48206400  | 0.10447900  | 1.64749200  |

|   |            |             |             |
|---|------------|-------------|-------------|
| H | 2.85608100 | -0.87439600 | 2.18974500  |
| H | 2.54583100 | 0.72015700  | 2.94534400  |
| C | 2.93688600 | 2.20586200  | 0.60936500  |
| H | 2.96056500 | 2.83138000  | 1.51264700  |
| H | 3.59874900 | 2.66778900  | -0.13772600 |
| H | 1.91057900 | 2.21486800  | 0.22036500  |
| C | 4.84480700 | 0.86234800  | 1.48440600  |
| H | 5.21109000 | -0.15315500 | 1.68409500  |
| H | 5.50802000 | 1.32543700  | 0.74138200  |
| H | 4.89631000 | 1.44422200  | 2.41541500  |
| O | 3.51452900 | -0.05143500 | -0.18571700 |
| C | 2.59844000 | 0.08988500  | -1.23012600 |
| H | 2.93450600 | -0.64024100 | -1.98542300 |
| H | 2.63224400 | 1.09196800  | -1.68258900 |
